# Supplementary material for: PQN-59 and GTBP-1 contribute to stress granule formation but are not essential for their assembly in C. elegans embryos
Source: Oxford University Press journal article supplement (doi:10.1242/jcs.258834), 2021-10-18
Supplement: jcs258834supp.pdf [file jcs258834supp.pdf]

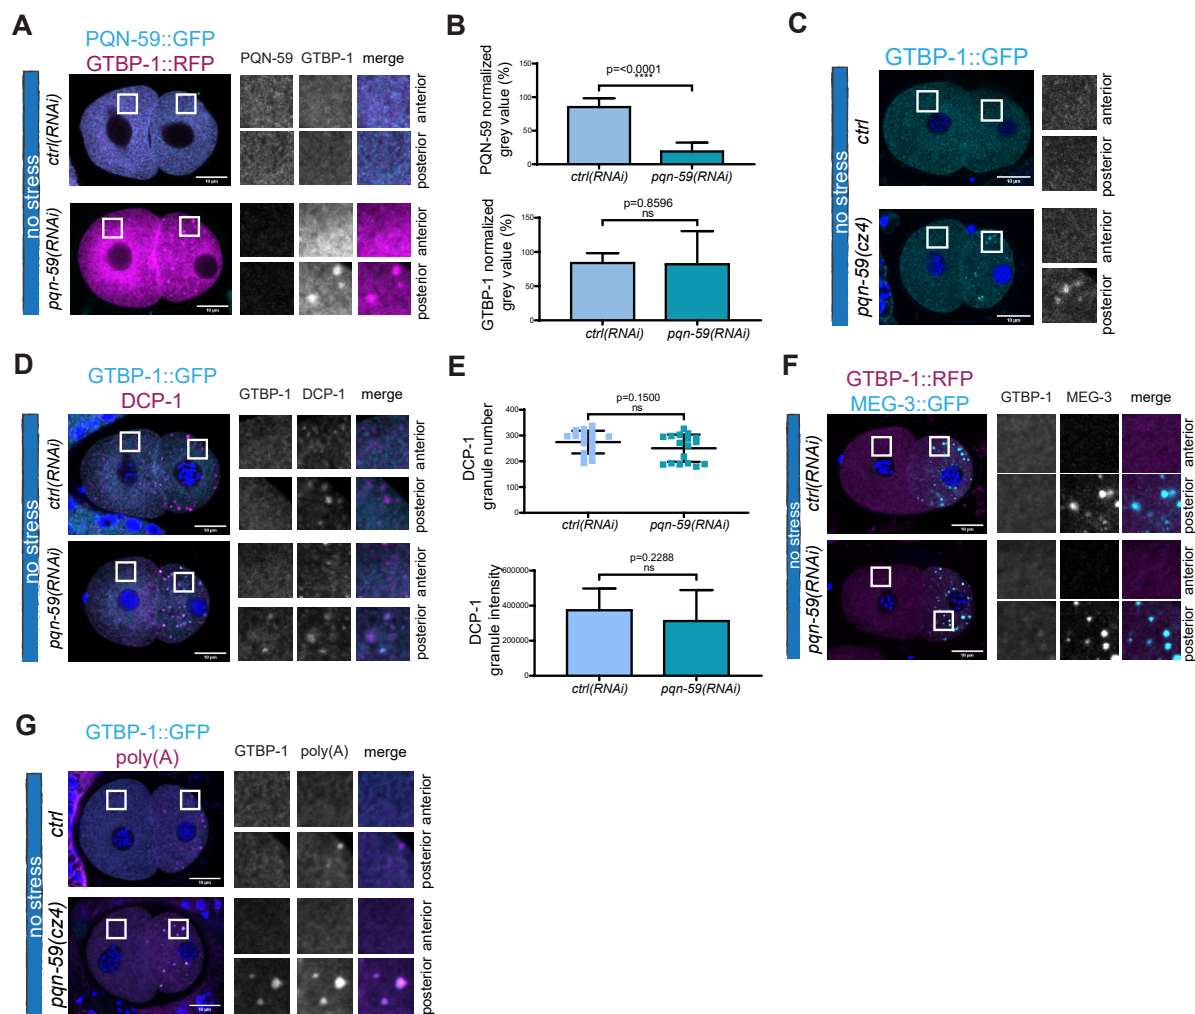

**Fig. S1. PQN-59 RNAi depletion or deletion results in stress-independent GTBP-1 granule formation in the posterior P1 blastomere. Related to Fig.3**

(A) Single confocal planes of *pqn-59::GFP;gtbp-1::RFP* fixed two-cell stage embryos treated with the indicated RNAi in non-heat-shocked conditions (no stress). (B) Quantification of the normalized cytoplasmic intensity of PQN-59 (top) and GTBP-1 (bottom) of *ctrl(RNAi)* and *pqn-59(RNAi)* in the anterior blastomere as in (A) (*ctrl(RNAi)* n=23; *pqn-59(RNAi)* n=38, N=4). (C) Single confocal planes of fixed two-cell stage *gtbp-1::GFP* and *pqn-59(cz4);gtbp-1::GFP* embryos, at 20°C (no stress). GTBP-1 GFP signal is in cyan and DNA was counterstained with DAPI (blue). (*ctrl* n=16, *pqn-59(cz4)* n=11, N=2). (D) Single confocal planes of *gtbp-1::GFP* fixed two-cell stage embryos (no stress) immunostained with DCP-1 antibodies (magenta). GTBP-1 GFP signal is in cyan and DNA was counterstained with DAPI (blue). Embryos were treated with *ctrl* or *pqn-59(RNAi)* as indicated (*ctrl(RNAi)* n=19; *pqn-59(RNAi)* n=17, N=3). (E) Quantifications of the number (top) and intensity (bottom) of DCP-1 granules in control and *pqn-59(RNAi)* embryos (from D). (F) Single confocal planes of *gtbp-1::RFP; meg-3::GFP* control and *pqn-59(RNAi)* two cell embryos not exposed stress. (G)

Single confocal planes of fixed two-cell stage *gtbp-1::GFP* and *pqn-59(cz4);gtbp-1::GFP* embryos (no stress) hybridized with a poly(A) FISH probe. GTBP-1 GFP signal is in cyan, the poly(A) signal in magenta and DNA was counterstained with DAPI (blue). (*ctrl* n=11, *pqn-59(cz4)* n=16, N=2) Error bars in B and E indicate S.D. The P-value was determined using two-tailed unpaired Student's *t*-test. n indicates the number of samples and N the number of independent experiments. ROIs are shown enlarged on the right of each set of embryos. Scale bars represent 10  $\mu$ m.

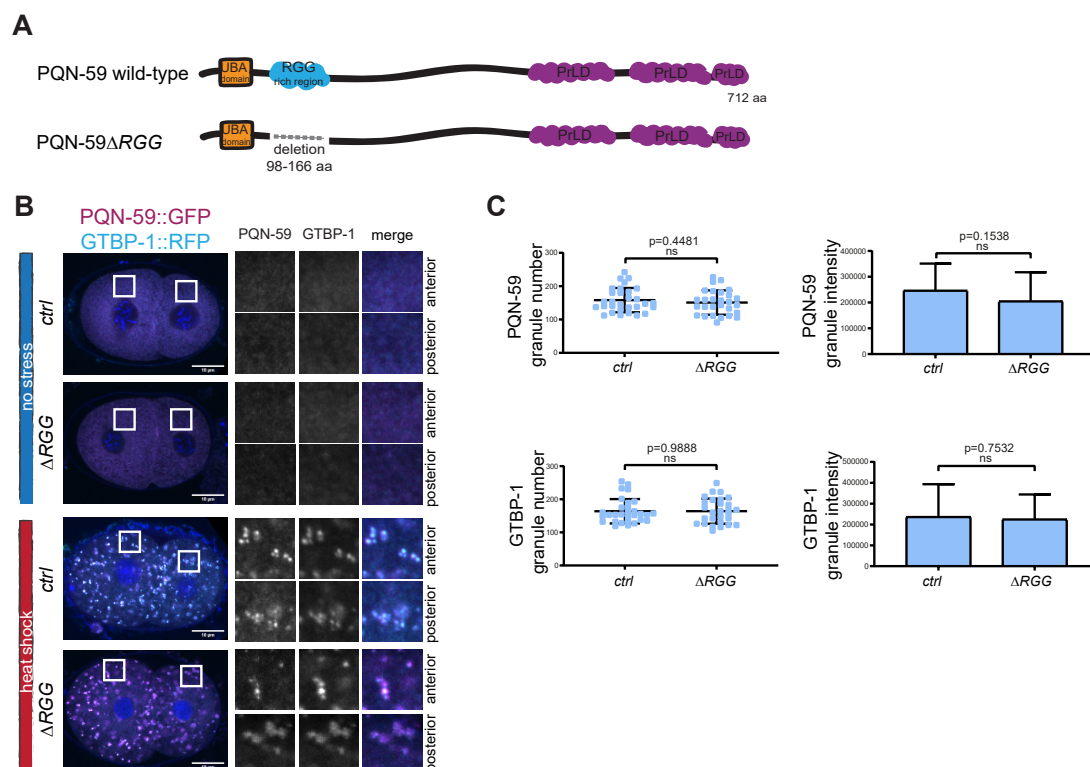

**Fig. S2. The RGG domain of PQN-59 is not required to assemble stress granules.**

(A) Illustration of the PQN-59 protein with the RGG deletion introduced by CRISPR/Cas9 in the strain *pqn-59::GFP;gtbp-1::RFP*. (B) Single confocal planes of *pqn-59::GFP;gtbp-1::RFP* and *pqn-59:: $\Delta$ RGG::GFP;gtbp-1::RFP* fixed two-cell stage embryos. PQN-59 GFP signal is in cyan, GTBP-1 RFP signal is in magenta and DNA was counterstained in blue. Scale bars represent 10  $\mu$ m. (C) Quantification of the average PQN-59 (top left) and GTBP-1 (bottom left) granule number per embryo and of the average normalized PQN-59 (top right) and GTBP-1 (bottom right) granule intensity per embryo (*pqn-59::GFP;gtbp-1::RFP* n=30; *pqn-59:: $\Delta$ RGG::GFP;gtbp-1::RFP*, n=28, N=3). Error bars indicate S.D. The P-value was determined using two-tailed unpaired Student's *t*-test. n indicates the number of samples and N the number of independent experiments.

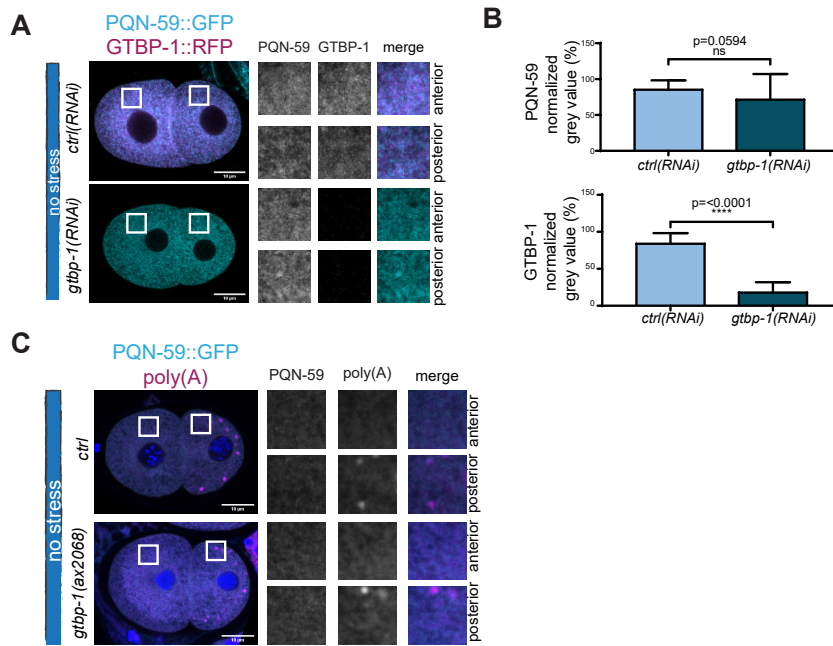

**Fig. S3. PQN-59 localization and levels in control and *gtbp-1(RNAi)* or *gtbp-1(ax2068)* embryos not exposed to stress. Related to Fig.4**

(A) Single confocal planes of *pqn-59::GFP;gtbp-1::RFP* fixed two-cell embryos treated with the indicated RNAi depletion in non-heat-shocked conditions (no stress). (B) Quantification of the normalized cytoplasmic intensity of PQN-59 (top) and GTBP-1 (bottom) of *ctrl(RNAi)* and *pqn-59(RNAi)* embryos at 20°C as in A (*ctrl(RNAi)* n=18; *gtbp-1(RNAi)* n=34, N=4). Error bars indicate S.D. The P-value was determined using Student's t-test. (C) Single confocal planes of *pqn-59::GFP* and *pqn-59::GFP;gtbp-1(ax2068)* fixed two-cell embryos hybridized with a poly(A) FISH probe. *ctrl*, n= 21, *gtbp-1(ax2068)*, n=16, N=2. n indicates the number of samples and N the number of independent experiments. Enlarged ROIs are shown on the right. Scale bars represent 10  $\mu$ m.

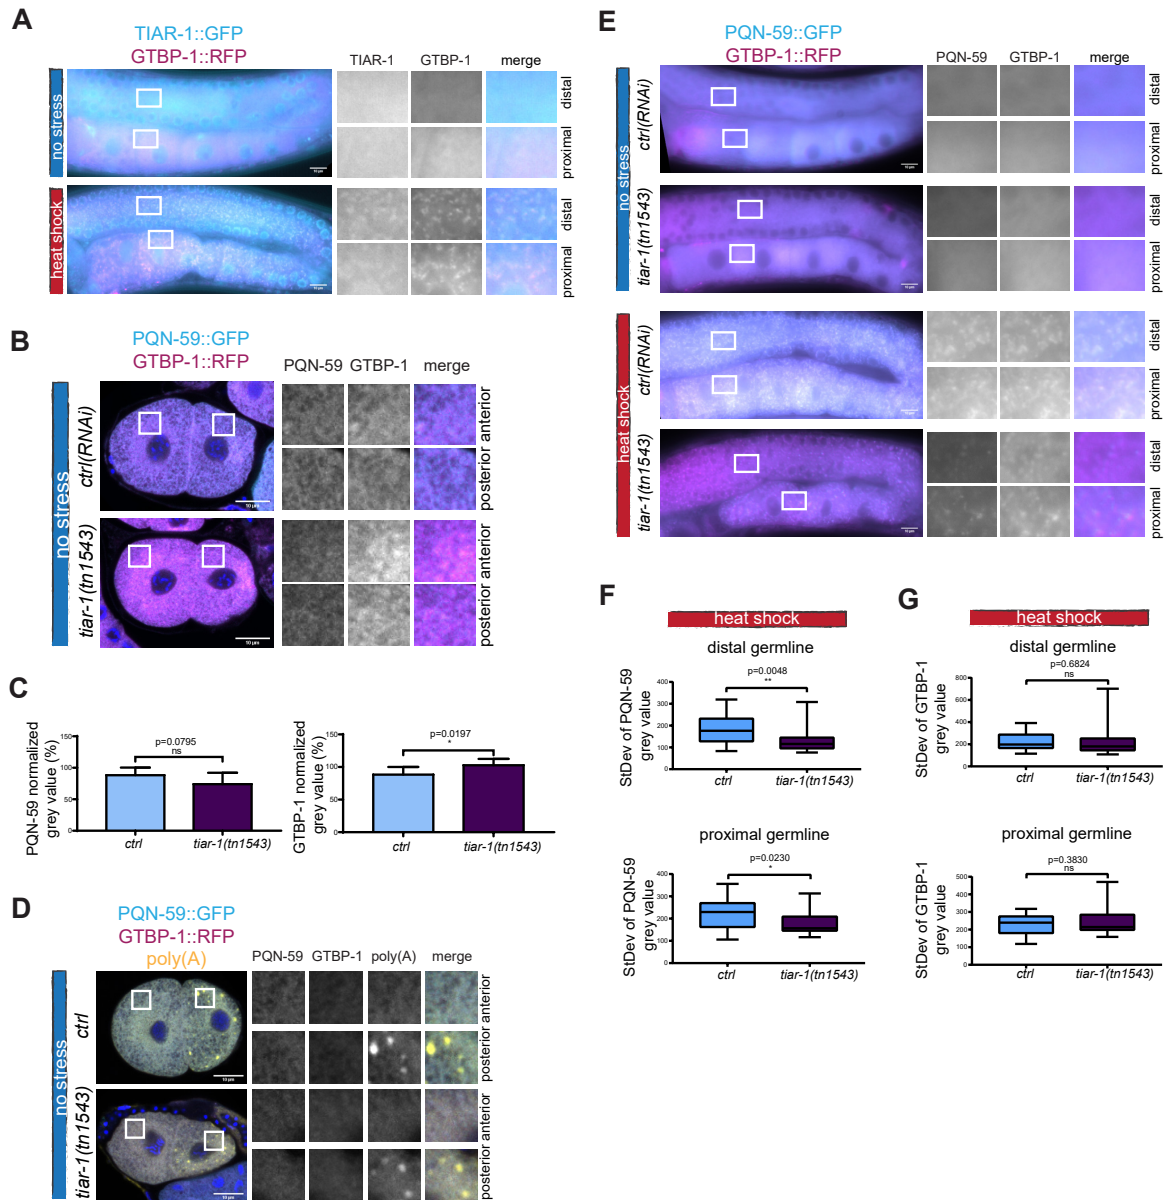

**Fig. S4. TIAR-1 localization in germlines exposed to heat shock and PQN-59 and GTBP-1 localization in *tiar-1(tn1543)* mutant embryos and germlines. Related to Fig. 5 and 6**

(A) Epifluorescence images of *tiar-1::GFP;gtbp-1::RFP* germlines. TIAR-1 (in cyan) and GTBP-1 (in magenta) assemble into granules that colocalize in germlines exposed to heat shock (no stress, n= 26 and stress, n= 34). (B) Single confocal planes of *pqn-59::GFP;gtbp-1::RFP* fixed control and *tiar-1(tn1543)* two-cell embryos. PQN-59 is in cyan and GTBP-1 in magenta (C) Quantification of the PQN-59 (left) and GTBP-1 (right) levels as in B. For PQN-59 levels, *ctrl*, n=7, *tiar-1(tn1543)*, n=7. For GTBP-1 levels, *ctrl*, n=7, *tiar-1(tn1543)*, n=7, N=1. (D) Single confocal planes of *pqn-59::GFP;gtbp-1::RFP* fixed control (n=9) and *pqn-59::GFP; tiar-1(tn1543);gtbp-1::RFP* (n=7) two-cell embryos hybridized with a poly(A) FISH probe. N=2. PQN-59 is in cyan, GTBP-1 in magenta and the poly(A)

signal in yellow. (E) Germline pictures of *pqn-59::GFP;gtbp-1::RFP* control (n=10, no stress, n= 24, HS) and *tiar-1(tn1543)* (n=10, no stress, n= 23, HS) taken with epifluorescence microscope exposed (bottom) or not (top) to heat shock. PQN-59 is in cyan and GTBP-1 in magenta. (F) and (G) Quantification of the standard deviation of the PQN-59 and GTBP-1 grey values in *control* and *tiar-1(tn1543)* distal (top) and proximal (bottom) germlines, sample number as in E. Error bars indicate S.D. The P-value was determined using two-tailed unpaired Student's *t*-test. n indicates the number of samples and N the number of independent experiments. Enlarged ROIs are shown on the right. Scale bars represent 10  $\mu$ m.

**Table S1. Strain List.** The strain used in this work are listed in this table in order of appearance in the text. The genotype, source and description of the mutation are also reported.

| Strain name   | Genotype                                                        | Source/Reference                                           | Description                                                                                                                                                       |
|---------------|-----------------------------------------------------------------|------------------------------------------------------------|-------------------------------------------------------------------------------------------------------------------------------------------------------------------|
| <b>HML713</b> | <i>csIs25(pqn-59::GFP) I; gtbp-1::RFP(ax5000) IV</i>            | (Carlston et al., 2021 preprint)                           | Strain generated by C. Hammell using CRISPR/Cas9. GFP has been inserted at the C-terminal of PQN-59 on the genotype K08F4.2 ( <i>ax5000[gtbp-1::tagRFP] IV</i> ). |
| <b>JH3199</b> | <i>gtbp-1(ax2055[gtbp-1::GFP]) IV</i>                           | CaenorhabditisGenetics Center (CGC)                        |                                                                                                                                                                   |
| <b>ZU291</b>  | <i>pqn-59::ollas::STOP(cz4); gtbp-1(ax2055[gtbp-1::GFP]) IV</i> | This study                                                 | Strain generated by CRISPR/Cas9, inserting a frameshift mutation generating a premature STOP. Background strain is JH3199 (Paix et al., 2014).                    |
| <b>ZU304</b>  | <i>gtbp-1::tagRFP(ax5000) IV; meg-3(ax3054[meg-3::meGFP]) X</i> | This study                                                 | Strain obtained crossing the JH3503 ( <i>meg-3::GFP</i> ) (Smith et al., with the <i>gtbp-1::tagRFP</i> ).                                                        |
| <b>ZU288</b>  | <i>pqn-59::ARGG::GFP; gtbp-1::RFP(ax5000) – clone 1</i>         | This study                                                 | Strain generated by CRISPR/Cas9, excising the RGG region of PQN-59. Background strain is HML713.                                                                  |
| <b>HML275</b> | <i>csIs25(pqn-59::GFP) I</i>                                    | (Carlston et al., 2021 preprint)                           | Strain generated by C. Hammell using CRISPR/Cas9. GFP has been inserted at the C-terminal of PQN-59 in a N2 background.                                           |
| <b>HML703</b> | <i>csIs25(pqn-59::GFP) I; gtbp-1(ax2068)</i>                    | (Carlston et al., 2021 preprint)                           | Strain generated by C. Hammell crossing the JH3212 (bearing a 1.6 kb deletion in <i>gtbp-1</i> , (Paix et al., 2014)) with the HML275.                            |
| <b>JH3176</b> | <i>gtbp-1(ax2029) IV</i>                                        | CaenorhabditisGenetics Center (CGC)<br>(Paix et al., 2014) | Mutant bearing a STOP codon insertion and frameshift mutation near the ATG of <i>gtbp-1</i> .                                                                     |

|               |                                                                                                    |                                                                           |                                                                                                                              |
|---------------|----------------------------------------------------------------------------------------------------|---------------------------------------------------------------------------|------------------------------------------------------------------------------------------------------------------------------|
| <b>DG3922</b> | <i>tiar-1(tn1545[tiar-1::s::tev::GFP]) II</i>                                                      | CaenorhabditisGenetics Center (CGC)<br><br>(Huelgas-Morales et al., 2016) |                                                                                                                              |
| <b>ZU294</b>  | <i>tiar-1(tn1545[tiar-1::s::tev::GFP]) II; gtbp-1(ax2029) IV</i>                                   | This study                                                                | Strain obtained crossing the DG3922 with the JH3176.                                                                         |
| <b>ZU306</b>  | <i>csIs25(pqn-59::GFP) I; tiar-1(tn1543)(loxP:Cbr-unc-119(+)::loxP) II; gtbp-1::RFP(ax5000) IV</i> | This study                                                                | Strain obtained crossing the DG3929 (TIAR-1 mutant generated by CRISPR/Cas9 (Huelgas-Morales et al., 2016)) with the HML713. |
| <b>ZU287</b>  | <i>tiar-1(tn1545[tiar-1::s::tev::GFP]) II; gtbp-1::tagRFP(ax5000)</i>                              | This study                                                                | Strain obtained crossing the DG3922 with the genotype K08F4.2 ( <i>ax5000[gtbp-1::tagRFP]</i> ) IV.                          |
| <b>N2</b>     | <i>wild type</i>                                                                                   | CaenorhabditisGenetics Center (CGC)                                       |                                                                                                                              |
| <b>ZU278</b>  | <i>pqn-59::ollas::STOP(cz2)</i>                                                                    | This study                                                                | Strain generated by CRISPR/Cas9, inserting a frameshift mutation generating a premature STOP. Background strain is N2.       |



**Table S2. CRISPR reagents.**

| Strain name | sgRNA sequence (5'->3')                                                              | Repair template sequence                                                                                                                                                                                       | Description                                                                                                                                                              |
|-------------|--------------------------------------------------------------------------------------|----------------------------------------------------------------------------------------------------------------------------------------------------------------------------------------------------------------|--------------------------------------------------------------------------------------------------------------------------------------------------------------------------|
| ZU291       | 1 FW RV<br>TCT TGG AAC AAA CTT TTG<br>AGA AAG GCT CCT TTC<br>GAG CCA TGT TCC<br>AAA  | TGG AGA TAA ACT TGA CTC<br>GTG GAC TGA <u>ACA GAA AGG</u><br><u>AGC CAA AAA AGA AAA GAA</u><br><u>GAA Gtc cgg att cgc caa cGA GCT</u><br>Cgg acc acg tct cat ggg aaa gCC<br><del>TGA ATA GGG CAG TTA AAA</del> | Insertion of the <i>ollas tag</i> for screening +<br>Nucleotide<br><b>substitution</b><br>generating a<br><del>prematureSTOP</del>                                       |
|             | 2 FW RV<br>TCT TGA AAA AAA CGC TTC<br>AGG AAA TTC TTT TCC<br>AGA AGA TTT TTC<br>AGC  | CAA CAG AGG ATT TGT AGC<br>AAG AGG CAG AG                                                                                                                                                                      |                                                                                                                                                                          |
| ZU288       | 1 FW RV<br>TCT TGG AGG AAA CCT GTT<br>GCA GTT ATA GTT ATA ACT<br>ACA ACA G GCC CTC C | AAGGAGCCAAAAAGGAAAAG<br>AAGAAGCCGGAAGAGGGGCAG<br><u>TTATAACAAC</u> <i>deletion</i><br><u>TATTCTCGAGCT</u> IGTTGCTCCAT<br>CATCAGCACTTGAGCCAGATG<br>CGTTCAC                                                      | Deletion of the RGG domain (from aa 98 to aa 166)<br><br>(PAM sites are inside the deleted region, therefore not shown in the repair template sequence)<br><br>(clone 1) |
|             | 2 FW RV<br>TCT TG G CTC AAA CGA GGT<br>GAG AAT ATC GGA TAT TCT<br>CAC CTC CGA GCT C  |                                                                                                                                                                                                                |                                                                                                                                                                          |
| ZU278       | FW RV<br>TCT TGG AAC AAA CTT TTG<br>AGA AAG GCT CCT TTC<br>GAG CCA TGT TCC<br>AAA    | TGGAGATAAACTTGACTC<br>GTGG <u>GACTGAACAGAAAG</u><br><u>GAGCCAAAAAAGAAAAGA</u><br><u>AGAAG</u> <i>tccgattcgccaacG</i><br><i>AGCTCgaccacgtctcatggaa</i><br><i>ag</i> <u>CCTGAAGAGGGCAGTT</u>                     | G nucleotide<br><b>insertion</b> + frameshift<br>+<br><i>ollas tag</i> for screening<br>+ <del>prematureSTOP</del>                                                       |
|             | 1 FW RV<br>TCT TGA AAA AAA CGC TTC<br>AGG AAA TTC TTT TCC<br>AGA AGA TTT TTC<br>AGC  | ATAACAACAGAGGATTTG<br>TAGCAAGAGGCAGAG                                                                                                                                                                          |                                                                                                                                                                          |

## LABEL

Underlined sequence is targeted by the sgRNA

In capital bold the silently mutated **PAM sites** (the first one originally AGG mutated in AAG and the second one originally CGG mutated in CTG)

In italic is the *OLLAS* sequence containing a SacI restriction site (italic upper cases)

In bold capital italic the ***nucleotide substitution or insertion***

Strikethrough in the sequence are the premature ~~STOP codon~~ and the ~~deletion~~

**Table S3. Oligonucleotides for PCR genotyping and sequencing.**

| Strain                 | Gene          |   | Oligonucleotide sequence  |                          | Description                                                                                                                    |
|------------------------|---------------|---|---------------------------|--------------------------|--------------------------------------------------------------------------------------------------------------------------------|
|                        |               |   | FW primer (5'→3')         | RV primer (5'→3')        |                                                                                                                                |
| <b>ZU291 and ZU278</b> | <i>pqn-59</i> | 1 | ttctagtctagcttgcggtg      | GCACCGATCTCATT<br>TGCTG  | PCR product is ~1600bp. After SacI digestion of this PCR product, fragments of ~1100bp and ~500bp are generated in the mutant. |
|                        |               | 2 | accacgtctcatgggaaag       | GCACCGATCTCATT<br>TGCTG  | FW primer is annealing to the ollas sequence. PCR product is ~1100bp.                                                          |
| <b>ZU288</b>           | <i>pqn-59</i> | 1 | CCAAAAAGGAAAAG<br>AAGAAGC | GGATGCTGTTGTGG<br>ATGTCC | The primers are external to the deletion. In the mutant, the PCR product is ~1300bp.                                           |
|                        |               | 2 | CCAAAAAGGAAAAG<br>AAGAAGC | GGATGCTGTTGTGG<br>ATGTCC | The FW primers is internal to the deletion. In the mutant, there is no amplification.                                          |
| <b>JH3176</b>          | <i>gtp-1</i>  |   | ctttcgaattcgcgcgttc       | GAACCTCCTCGATT<br>TCTCC  | PCR product is ~1600bp. After NheI digestion of this PCR product, fragments of ~900bp and ~700bp are generated in the mutant.  |

**Table S4. dsRNA sequences.**

| Target gene   | Clone name from Ahringer library | Oligonucleotides sequence (5'→3') |                            |
|---------------|----------------------------------|-----------------------------------|----------------------------|
| <i>ctrl</i>   | C06A6.2                          | Standard T7 primers               |                            |
| <i>pqn-59</i> |                                  | FW                                | RV                         |
|               |                                  | CCAAATCAAGCAT                     | TTA GTT ACT CCA GTT GTA CG |
|               |                                  | GGACCA                            |                            |
| <i>gtbp-1</i> | K08F4.2                          | Standard T7 primers               |                            |
| <i>tiar-1</i> |                                  | FW                                | RV                         |
|               |                                  | CGTAATACGACTCACT                  | CGTAATACGACTCA             |
|               |                                  | ATAGcagGAGATGAAAGTCA              | CTATAGtacCAGTAAGTGAAGC     |
|               |                                  | ACTG                              | AATG                       |
| <i>perm-1</i> | T01H3.4                          | Standard T7 primers               |                            |

**Table S5. Primary antibodies list.**

| Antibody                    | Source/Reference                                      | Working concentration/dilution |        |
|-----------------------------|-------------------------------------------------------|--------------------------------|--------|
|                             |                                                       | IF                             | WB     |
| <b>rabbit anti-PQN-59</b>   | This study                                            | 2ng/μl                         | 2ng/μl |
| <b>rabbit anti-DCP-1</b>    | Gift from Jayne Squirrell<br>(Squirrell et al., 2006) | 1:5000                         |        |
| <b>Mouse anti-a TUBULIN</b> | Sigma-Aldrich                                         |                                | 1:2500 |

## References

- Carlston, C., Weinmann, R., Stec, N., Abbate-marco, S., Schwager, F., Wang, J., Ouyang, H., Gotta, M., Hammell, C.M., 2021. PQN-59 antagonizes microRNA-mediated repression and functions in stress granule formation during *C. elegans* development. *BiorXiv* 2021.05.14.444139; doi: <https://doi.org/10.1101/2021.05.14.444139>
- Huelgas-Morales, G., Silva-Garcia, C. G., Salinas, L. S., Greenstein, D. & Navarro, R. E. The Stress Granule RNA-Binding Protein TIAR-1 Protects Female Germ Cells from Heat Shock in *Caenorhabditis elegans*. *G3 (Bethesda)* **6**, 1031-1047, doi:10.1534/g3.115.026815 (2016).
- Paix, A. *et al.* Scalable and versatile genome editing using linear DNAs with microhomology to Cas9 Sites in *Caenorhabditis elegans*. *Genetics* **198**, 1347-1356, doi:10.1534/genetics.114.170423 (2014).
- Smith, J. *et al.* Spatial patterning of P granules by RNA-induced phase separation of the intrinsically-disordered protein MEG-3. *Elife* **5**, doi:10.7554/eLife.21337 (2016).
- Squirrell, J. M. *et al.* CAR-1, a protein that localizes with the mRNA decapping component DCAP-1, is required for cytokinesis and ER organization in *Caenorhabditis elegans* embryos. *Mol Biol Cell* **17**, 336-344, doi:10.1091/mbc.e05-09-0874 (2006).
